# Supplementary material for: Sodium Butyrate Attenuates AGEs-Induced Oxidative Stress and Inflammation by Inhibiting Autophagy and Affecting Cellular Metabolism in THP-1 Cells
Source: MDPI journal article supplement (doi:10.3390/molecules27248715), 2022-12-09
Supplement: s1 [file s1]

Supplementary Materials

## Sodium Butyrate Attenuates AGEs-Induced Oxidative Stress and Inflammation by Inhibiting Autophagy and Affecting Cellular Metabolism in THP-1 Cells

Man Yan 1,†, Xiang Li 2,†, Chang Sun 1, Jiajun Tan 1, Yuanyuan Liu 3, Mengqi Li 1, Zishang Qi 1, Jiayuan He 4, Dongxu Wang 5,\* and Liang Wu 1,\*

1 Department of Laboratory Medicine, School of Medicine, Jiangsu University, Zhenjiang 212013, China

2 Medical Laboratory Department, Huai'an Second People's Hospital, Huai'an 223022, China

3 Department of Endocrinology, The Affiliated Huai'an No. 1 People's Hospital of Nanjing Medical University, Huai'an 223300, China

4 Zhenjiang Center for Disease Control and Prevention, Zhenjiang 212002, China

5 School of Grain Science and Technology, Jiangsu University of Science and Technology, Zhengjiang 212100, China

\* Correspondence: wdx@just.edu.cn (D.W.); wlujs@ujs.edu.cn (L.W.)

† These authors contributed equally to this work.

**Table S1.** The primers used in this experiment.

| Gene             | Primer sequences (5'→3')                                 |
|------------------|----------------------------------------------------------|
| <i>GAPDH</i>     | F: CATCACTGCCACCCAGAAGACTG<br>R: ATGCCAGTGAGCTTCCCGTTCAG |
| <i>IL-1β</i>     | F: CCTGTCCTGCGTGTTGAAAGA<br>R: GGGAAGTGGGCAGACTCAAA      |
| <i>TNF-α</i>     | F: AATGGCGTGGAGCTGAGA<br>R: TGGCAGAGAGGAGGTTGAC          |
| <i>NLRP3</i>     | F: AACAGCCACCTCACTTCCAG<br>R: CCAACCACAATCTCCGAATG       |
| <i>caspase-1</i> | F: GCACAAGACCTCTGACAGCA<br>R: TTGGGCAGTTCTTGGTATTC       |
